# Supplementary material for: Physiotherapy and Exercise Management of People Undergoing Surgery for Lung Cancer: A Survey of Current Practice across Australia and New Zealand
Source: MDPI journal article supplement (doi:10.3390/jcm12062146), 2023-03-09
Supplement: s1 [file s1]

## Supplementary File S3: Social Media Survey Announcement Example

The following announcement was published on social media:

“Go into the draw to win a new Apple iPad and help us to understand current practices around exercise management for people undergoing thoracic surgery for lung cancer in Australia or New Zealand!

Researchers from the University of Melbourne want to hear from you regarding the current practices in the assessment and management of these patients across the continuum (e.g., pre-operatively, post-operative acute, and outpatient/community programs including pulmonary and oncology rehabilitation).

Link to survey and plain language statement here: [bit.ly/thoracicsurgsurvey](http://bit.ly/thoracicsurgsurvey)

We would appreciate it if you could share this widely among your networks (not just physios) so that we can get an accurate snapshot of current clinical practice in this area.

Please email Ms Georgina Whish-Wilson ([gwhishwilson@student.unimelb.edu](mailto:gwhishwilson@student.unimelb.edu)) PhD student with any queries.

Thank you!”

**ARE YOU AN EXERCISE HEALTH PROFESSIONAL WORKING WITH PEOPLE WITH LUNG CANCER?**  
E.G PHYSIOTHERAPIST, EXERCISE PHYSIOLOGIST, AHA

We are conducting an online survey to understand the current practices across Australia and New Zealand in the assessment and management of people undergoing lung cancer surgery, in the pre-operative and post-operative phase (up to 12 months after surgery) and we would love to hear from you!

If you are a currently practicing exercise health professional working with patients undergoing lung cancer surgery in any setting (e.g. pre-operative, acute wards, outpatient/community rehabilitation) in Australia or New Zealand, you are eligible to complete our survey and go into the draw to win a new Apple iPad.

**WANT TO BE INVOLVED?**

To complete the survey, scan the QR code or head to: [bit.ly/thoracicsurgsurvey](http://bit.ly/thoracicsurgsurvey)

For more information about this research project, please contact: Georgina Whish-Wilson on [gwhishwilson@student.unimelb.edu](mailto:gwhishwilson@student.unimelb.edu) or A/Prof Catherine Granger on [catherine.granger@unimelb.edu.au](mailto:catherine.granger@unimelb.edu.au)

THE UNIVERSITY OF MELBOURNE

This study has ethics approval (ID: 23112) from the Human Research Ethics Committee at the University of Melbourne.

**Figure S1.** Flyer attached to social media post advertising the survey.
