# Supplementary material for: Physiotherapy and Exercise Management of People Undergoing Surgery for Lung Cancer: A Survey of Current Practice across Australia and New Zealand
Source: MDPI journal article supplement (doi:10.3390/jcm12062146), 2023-03-09
Supplement: s1 [file s1]

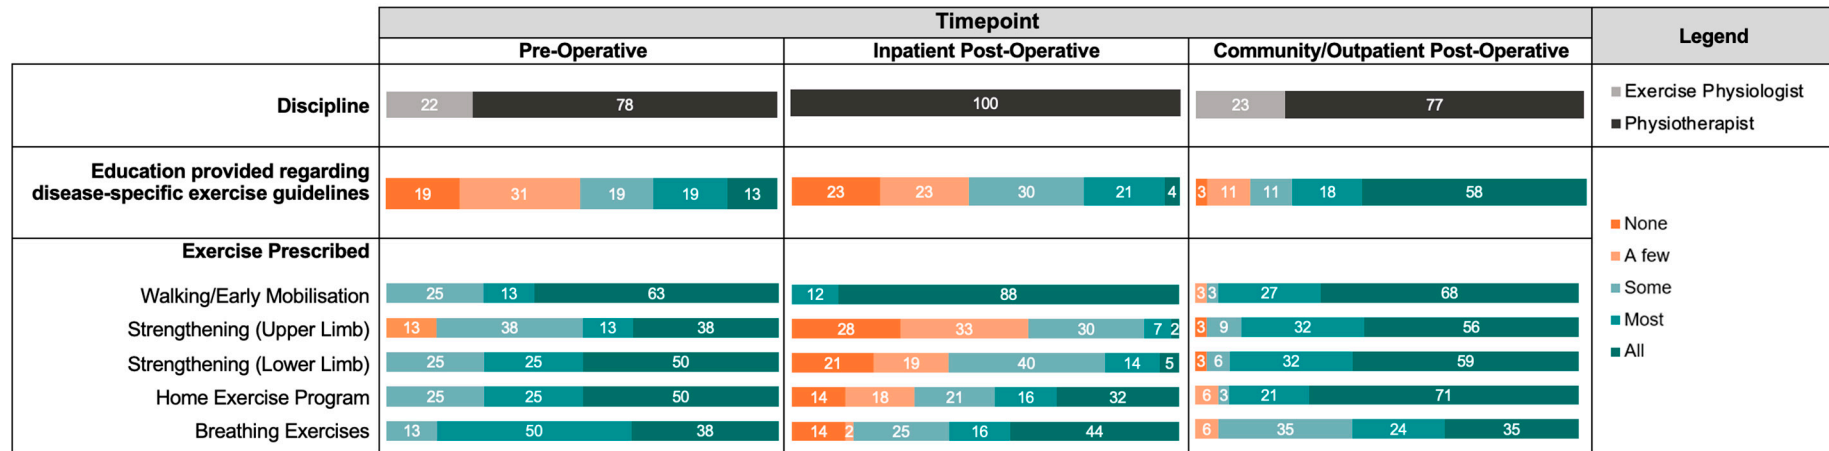

**Figure S5.** Comparison of exercise providers, education, and prescription across the continuum of care (% of respondents out of total).
